# Supplementary material for: A global viral oceanography database (gVOD)
Source: Copernicus journal article supplement (doi:10.5194/essd-13-1251-2021), 2021-03-24
Supplement: Supplementary file 1 [file essd-13-1251-2021-supplement.zip]

Supplementary Materials for

## **A global viral oceanography database (gVOD)**

Le Xie<sup>1</sup>, Wei Wei<sup>1</sup>, Lanlan Cai<sup>1</sup>, Xiaowei Chen<sup>1</sup>, Yuhong Huang<sup>1</sup>, Nianzhi Jiao<sup>1</sup>, Rui Zhang<sup>1,\*</sup>, Ya-Wei Luo<sup>1,\*</sup>

<sup>1</sup>State Key Laboratory of Marine Environmental Science, College of Ocean and Earth Sciences, Xiamen University, Xiamen, Fujian 361102, China

*Correspondence to:* Rui Zhang (ruizhang@xmu.edu.cn) and Ya-Wei Luo (ywluo@xmu.edu.cn)

Includes:

Table S1

Table S2

Figure S1

Figure S2

Figure S3

References

Table S1. Sources and methods of viral abundance data. EFM: counted by epifluorescence microscopes. FCM: counted by flow cytometer. TEM: counted by transmission electron microscopy. Data marked by \* are those collected in a previous dataset (Wigington et al., 2016).

| Region                         | Number of data | Method | References                   |
|--------------------------------|----------------|--------|------------------------------|
| Canadian Arctic Shelf *        | 259            | EFM    | (Payet and Suttle, 2013)     |
| Gulf of Alaska, Arctic *       | 292            | EFM    | (Balsom, 2003)               |
| Franklin Bay<br>(Arctic Ocean) | 4              | EFM    | (Wells and Deming, 2006)     |
| Greenland Sea, Arctic          | 79             | FCM    | (Boras et al., 2010a)        |
| Greenland Sea *                | 124            | EFM    | (Wigington et al., 2016)     |
| Arctic Ocean                   | 56             | FCM    | (Finke et al., 2017)         |
| Kora Sea<br>(Arctic Ocean)     | 18             | EFM    | (Kopylov et al., 2019)       |
| North Sea                      | 16             | EFM    | (Weinbauer et al., 2002)     |
| North Sea                      | 9              | EFM    | (Winter et al., 2005)        |
| North Sea                      | 39             | FCM    | (Parada et al., 2008)        |
| North Sea *                    | 191            | FCM    | (Wigington et al., 2016)     |
| North Sea *                    | 95             | FCM    | (Wigington et al., 2016)     |
| North Sea                      | 23             | FCM    | (Winter et al., 2004)        |
| North Atlantic                 | 5              | TEM    | (Proctor and Fuhrman, 1990)  |
| North Atlantic *               | 188            | FCM    | (Li and Dickie, 2001)        |
| North Atlantic                 | 11             | EFM    | (Auguet et al., 2005)        |
| North Atlantic                 | 6              | FCM    | (Parada et al., 2007)        |
| North Atlantic                 | 20             | TEM    | (Bettarel et al., 2008)      |
| North Atlantic                 | 31             | EFM    | (Rowe et al., 2008)          |
| North Atlantic *               | 772            | FCM    | (De Corte et al., 2012)      |
| North Atlantic                 | 9              | FCM    | (Muck et al., 2014)          |
| North Atlantic *               | 206            | FCM    | (Mojica et al., 2015)        |
| North Atlantic                 | 41             | EFM    | (Parsons et al., 2015)       |
| North Atlantic                 | 10             | FCM    | (Winter et al., 2018)        |
| North Atlantic                 | 39             | FCM    | (Finke et al., 2017)         |
| Gulf of Mexico                 | 14             | TEM    | (Jiang and Paul, 1996)       |
| Gulf of Mexico                 | 9              | EFM    | (Weinbauer and Suttle, 1996) |
| Gulf of Mexico                 | 12             | TEM    | (Cochran and Paul, 1998)     |
| Gulf of Mexico                 | 7              | EFM    | (Weinbauer and Suttle, 1999) |
| Gulf of Mexico                 | 25             | EFM    | (Williamson et al., 2002)    |
| Gulf of Mexico                 | 28             | EFM    | (Long et al., 2008)          |
| Chesapeake Bay                 | 7              | EFM    | (Winget and Wommack, 2009)   |

|                                   |      |     |                               |
|-----------------------------------|------|-----|-------------------------------|
| Chesapeake Bay *                  | 84   | EFM | (Wang et al., 2011)           |
| Sargasso Sea *                    | 1382 | EFM | (Parsons et al., 2012)        |
| Tropical Atlantic                 | 10   | EFM | (Winter et al., 2008)         |
| Tropical Atlantic                 | 154  | FCM | (De Corte et al., 2010)       |
| Atlantic Ocean                    | 426  | FCM | (Lara et al., 2017)           |
| South Atlantic                    | 3    | EFM | (Bettarel et al., 2011b)      |
| South Atlantic                    | 172  | FCM | (Liang et al., 2014)          |
| South Atlantic                    | 3    | FCM | (Gregoracci et al., 2015)     |
| South Atlantic *                  | 430  | FCM | (De Corte et al., 2016)       |
| Guanabana Bay<br>(South Atlantic) | 246  | FCM | (Cabral et al., 2017)         |
| Adriatic<br>(Mediterranean)       | 35   | TEM | (Weinbauer et al., 1993)      |
| Mediterranean                     | 25   | EFM | (Bettarel et al., 2002)       |
| Mediterranean and Baltic<br>Sea   | 30   | EFM | (Weinbauer et al., 2003)      |
| Adriatic<br>(Mediterranean)       | 4    | EFM | (Bongiorni et al., 2005)      |
| Mediterranean                     | 48   | EFM | (Magagnini et al., 2007)      |
| Mediterranean                     | 24   | FCM | (Boras et al., 2009)          |
| Mediterranean                     | 3    | EFM | (Motegi et al., 2009)         |
| Mediterranean                     | 43   | FCM | (Winter et al., 2009)         |
| Mediterranean                     | 9    | EFM | (Fonda Umani et al., 2010)    |
| Mediterranean                     | 6    | FCM | (Bouvier and Maurice, 2011)   |
| Mediterranean                     | 10   | EFM | (Maurice et al., 2011)        |
| Mediterranean                     | 338  | FCM | (Magiopoulos and Pitta, 2012) |
| Mediterranean                     | 45   | EFM | (Maurice et al., 2013)        |
| Mediterranean                     | 1    | FCM | (Motegi et al., 2014)         |
| Mediterranean                     | 2    | FCM | (Thompson et al., 2014)       |
| Mediterranean                     | 21   | EFM | (Ordulj et al., 2017)         |
| Baltic Sea                        | 6    | FCM | (Holmfeldt et al., 2010)      |
| Baltic sea                        | 9    | FCM | (Kostner et al., 2017)        |
| Baltic sea                        | 4    | EFM | (Šulčius et al., 2018)        |
| Indian Ocean *                    | 52   | EFM | (Wigington et al., 2016)      |
| Indian Ocean                      | 93   | FCM | (Liang et al., 2014)          |
| Cochin Estuary<br>(Indian)        | 35   | EFM | (Parvathi et al., 2013)       |

|                                        |     |     |                            |
|----------------------------------------|-----|-----|----------------------------|
| Cochin Estuary<br>(Indian)             | 20  | EFM | (Jasna et al., 2017)       |
| Cochin Estuary<br>(Indian)             | 39  | EFM | (Jasna et al., 2018)       |
| Indian Ocean                           | 271 | FCM | (Lara et al., 2017)        |
| Indian Ocean                           | 33  | EFM | (Parvathi et al., 2018)    |
| Red Sea                                | 51  | FCM | (Sabbagh et al., 2020)     |
| Bering Sea                             | 12  | TEM | (Steward et al., 1996)     |
| Bering Sea                             | 15  | FCM | (Finke et al., 2017)       |
| Santa Monica Bay                       | 7   | EFM | (Noble and Fuhrman, 2000)  |
| Japan sea                              | 12  | EFM | (Hwang and Cho, 2002)      |
| Masan Bay                              | 24  | EFM | (Choi et al., 2003)        |
| North Pacific                          | 36  | EFM | (Taylor et al., 2003)      |
| North Pacific (HOT)                    | 8   | EFM | (Brum, 2005)               |
| San Pedro Channel<br>(North Pacific)   | 386 | EFM | (Fuhrman et al., 2006)     |
| North Pacific                          | 11  | EFM | (Hewson and Fuhrman, 2007) |
| Strait of Georgia<br>(North Pacific) * | 67  | EFM | (Clasen et al., 2008)      |
| Bach Dang Estuary<br>(North Pacific)   | 15  | TEM | (Bettarel et al., 2011a)   |
| North Pacific *                        | 355 | FCM | (Yang et al., 2014)        |
| Northwestern Pacific                   | 39  | FCM | (Li et al., 2014)          |
| Pearl River Estuary<br>(North Pacific) | 19  | FCM | (Ni et al., 2015)          |
| North Pacific                          | 4   | EFM | (Pasulka et al., 2015)     |
| Bohai sea                              | 8   | FCM | (Ma et al., 2016)          |
| North Pacific *                        | 9   | EFM | (Wigington et al., 2016)   |
| North Pacific                          | 399 | FCM | (Finke et al., 2017)       |
| North Pacific                          | 37  | EFM | (Gainer et al., 2017)      |
| Western Pacific                        | 244 | FCM | (Liang et al., 2017)       |
| Western Pacific                        | 222 | FCM | (Zhao et al., 2020)        |
| Jiulong Estuary<br>(North Pacific)     | 27  | FCM | (Chen et al., 2019)        |
| South China Sea                        | 751 | FCM | unpublished                |
| South China Sea                        | 6   | FCM | (Zhang et al., 2007)       |
| South China Sea                        | 13  | FCM | (Chen et al., 2011)        |
| South China Sea                        | 5   | EFM | (Nguyen-Kim et al., 2015)  |

|                                       |     |     |                               |
|---------------------------------------|-----|-----|-------------------------------|
| Mariana Trench                        | 6   | FCM | (Li et al., 2018)             |
| Pacific Ocean                         | 171 | FCM | (Liang et al., 2014)          |
| Pacific Ocean                         | 331 | FCM | (Lara et al., 2017)           |
| South Pacific *                       | 12  | EFM | (Wilhelm et al., 2003)        |
| South Pacific                         | 31  | EFM | (Strzepek et al., 2005)       |
| South Pacific                         | 2   | EFM | (Motegi C and Nagata T, 2007) |
| South Pacific *                       | 24  | EFM | (Rowe et al., 2012)           |
| South Pacific                         | 10  | EFM | (Bouvy et al., 2012)          |
| South Pacific *                       | 16  | EFM | (Matteson et al., 2012)       |
| South Pacific *                       | 542 | FCM | (Yang et al., 2014)           |
| Southern Ocean<br>(Indian sector)     | 14  | FCM | (Evans et al., 2009)          |
| Southern Ocean<br>(Indian sector)     | 10  | FCM | (Malits et al., 2014)         |
| Southern Ocean<br>(Atlantic sector) * | 33  | FCM | (Evans and Brussaard, 2012)   |
| Southern Ocean<br>(Atlantic sector)   | 25  | EFM | (Brum et al., 2016)           |
| Southern Ocean<br>(Pacific sector)    | 161 | FCM | (Vaque et al., 2017)          |

Table S2. Sources and methods of VP data. FPB: Calculated by multiplying fraction of viral infected cells, prokaryotic production and burst size; RIA: radioactive incorporation approach; FLVT: fluorescently labeled viral tracers method; VRA: virus reduction approach (see main text section 2.3 for details). MC: Virus reduction approach with addition of inducing agent such as Mitomycin C (see main text section 2.4 for details).

| Region                      | #lytic VP | Method of lytic VP | # lysogenic VP | Method of lysogenic VP | References                 |
|-----------------------------|-----------|--------------------|----------------|------------------------|----------------------------|
| Canadian Arctic Shelf       | 14        | VRA                | -              | -                      | (Payet and Suttle, 2013)   |
| Franklin Bay (Arctic Ocean) | 3         | VRA                | -              | -                      | (Wells and Deming, 2006)   |
| Greenland Sea, Arctic       | 17        | VRA                | 7              | MC                     | (Boras et al., 2010b)      |
| North                       | 9         | VRA                | -              | -                      | (Winter et al., 2005)      |
| North Sea                   | 28        | VRA                | -              | -                      | (Parada et al., 2008)      |
| North Atlantic              | 26        | VRA                | -              | -                      | (Rowe et al., 2008)        |
| North Atlantic              | 18        | VRA                | 10             | MC                     | (De Corte et al., 2012)    |
| North Atlantic              | 9         | VRA                | 9              | MC                     | (Muck et al., 2014)        |
| North Atlantic              | 10        | VRA                | -              | -                      | (Winter et al., 2018)      |
| Chesapeake Bay              | 7         | VRA                | -              | -                      | (Winget and Wommack, 2009) |
| Tropical Atlantic           | 9         | VRA                | 8              | MC                     | (De Corte et al., 2010)    |
| Baltic Sea                  | 6         | VRA                | -              | -                      | (Holmfeldt et al., 2010)   |
| Baltic Sea                  | 9         | VRA                | -              | -                      | (Kostner et al., 2017)     |
| Baltic Sea                  | 4         | VRA                | -              | -                      | (Šulčius et al., 2018)     |
| Mediterranean               | 24        | VRA                | 11             | MC                     | (Boras et al., 2009)       |
| Adriatic (Mediterranean)    | 4         | VRA                | -              | -                      | (Bongiorni et al., 2005)   |
| Mediterranean               | 9         | VRA                | -              | -                      | (Fonda Umani et al., 2010) |
| Mediterranean               | 1         | VRA                | -              | -                      | (Motegi et al., 2014)      |
| Mediterranean               | 21        | VRA                | -              | -                      | (Ordulj et al., 2017)      |
| Cochin Estuary (Indian)     | 35        | RIA                | -              | -                      | (Parvathi et al., 2013)    |
| Cochin Estuary (Indian))    | 20        | VRA                | -              | -                      | (Jasna et al., 2017)       |
| Indian Ocean                | 10        | VRA                | -              | -                      | (Parvathi et al., 2018)    |
| Bering Sea                  | 12        | FPB                | -              | -                      | (Steward et al., 1996)     |

|                                                  |    |      |    |    |                                |
|--------------------------------------------------|----|------|----|----|--------------------------------|
| Santa Monica Bay                                 | 7  | FLVT | -  | -  | (Noble and Fuhrman, 2000)      |
| Subtropics Atlantic,<br>Pacific, Indian<br>Ocean | 30 | VRA  | 27 | MC | (Lara et al., 2017)            |
| North Pacific<br>(HOT)                           | 4  | VRA  | -  | -  | (Brum, 2005)                   |
| North Pacific                                    | 9  | VRA  | -  | -  | (Hewson and<br>Fuhrman, 2007)  |
| North Pacific                                    | 18 | VRA  | -  | -  | (Gainer et al., 2017)          |
| South Pacific                                    | 16 | VRA  | -  | -  | (Matteson et al.,<br>2012)     |
| Mariana Trench                                   | 6  | VRA  | -  | -  | (Li et al., 2018)              |
| Western Pacific                                  | 38 | VRA  | -  | -  | (Li et al., 2014)              |
| Japan Sea                                        | 12 | FPB  | -  | -  | (Hwang and Cho,<br>2002)       |
| Masan Bay                                        | 24 | FPB  | -  | -  | (Choi et al., 2003)            |
| Bach Dang Estuary<br>(North Pacific)             | 7  | VRA  | -  | -  | (Bettarel et al.,<br>2011a)    |
| South China Sea                                  | 13 | VRA  | -  | -  | (Chen et al., 2011)            |
| South China Sea                                  | 5  | FLVT | -  | -  | (Nguyen-Kim et al.,<br>2015)   |
| Jiulong Estuary<br>(North Pacific)               | 27 | VRA  | 27 | MC | (Chen et al., 2019)            |
| Southwestern<br>Pacific                          | 9  | VRA  | -  | -  | (Rowe et al., 2012)            |
| Southern Ocean<br>(Indian sector)                | 14 | VRA  | -  | -  | (Evans et al., 2009)           |
| Southern Ocean<br>(Indian sector)                | 10 | VRA  | -  | -  | (Malits et al., 2014)          |
| Southern Ocean<br>(Pacific sector)               | 16 | VRA  | 8  | MC | (Vaque et al., 2017)           |
| Southern Ocean<br>(Atlantic sector)              | 5  | VRA  | -  | -  | (Weinbauer et al.,<br>2009)    |
| Southern Ocean<br>(Atlantic sector)              | 33 | VRA  | 12 | MC | (Evans and<br>Brussaard, 2012) |

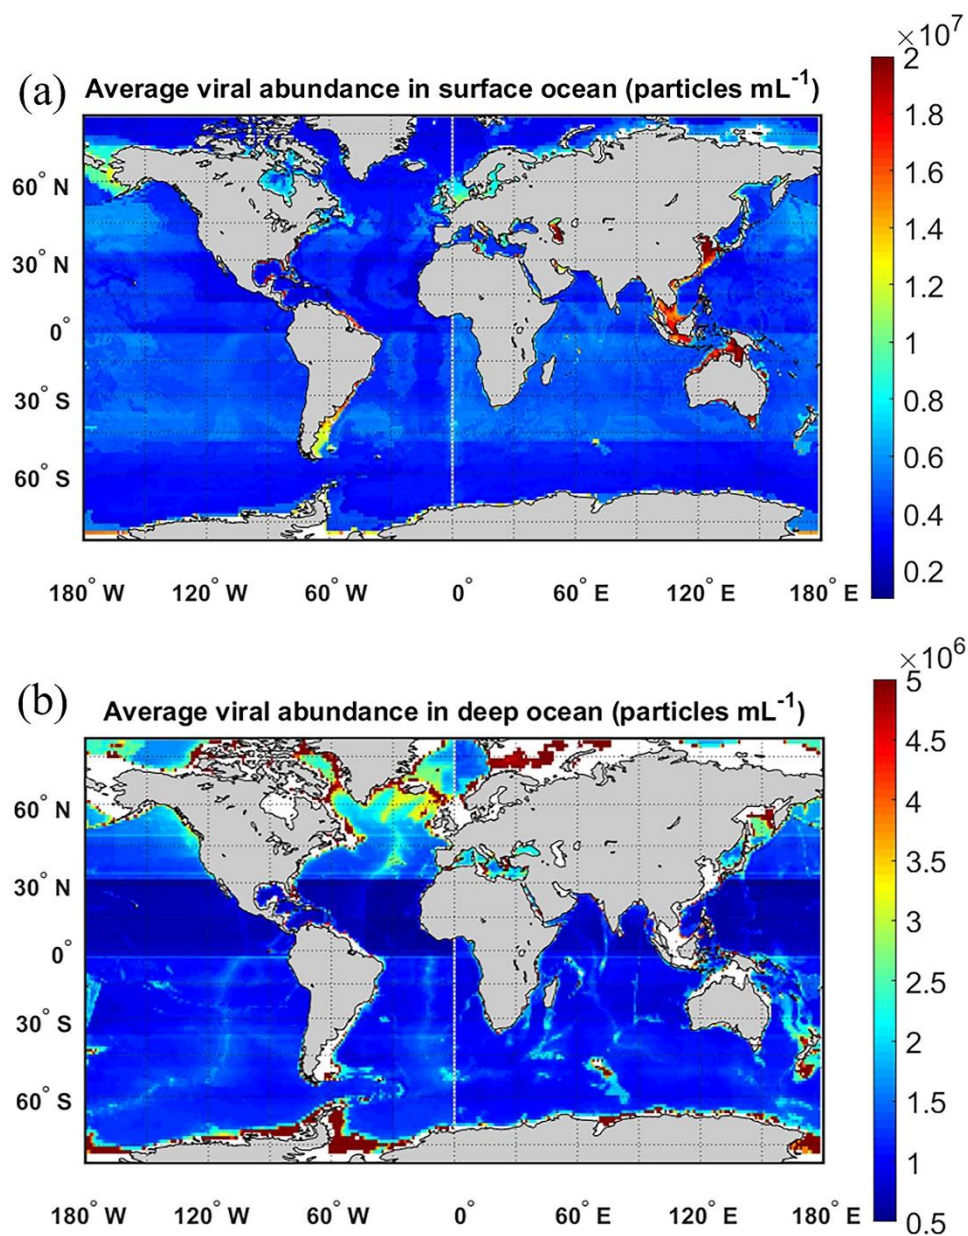

Figure S1. Viral abundance projected using the random forest, showing average in **(a)** surface 200 m and **(b)** deep (>200 m) oceans.



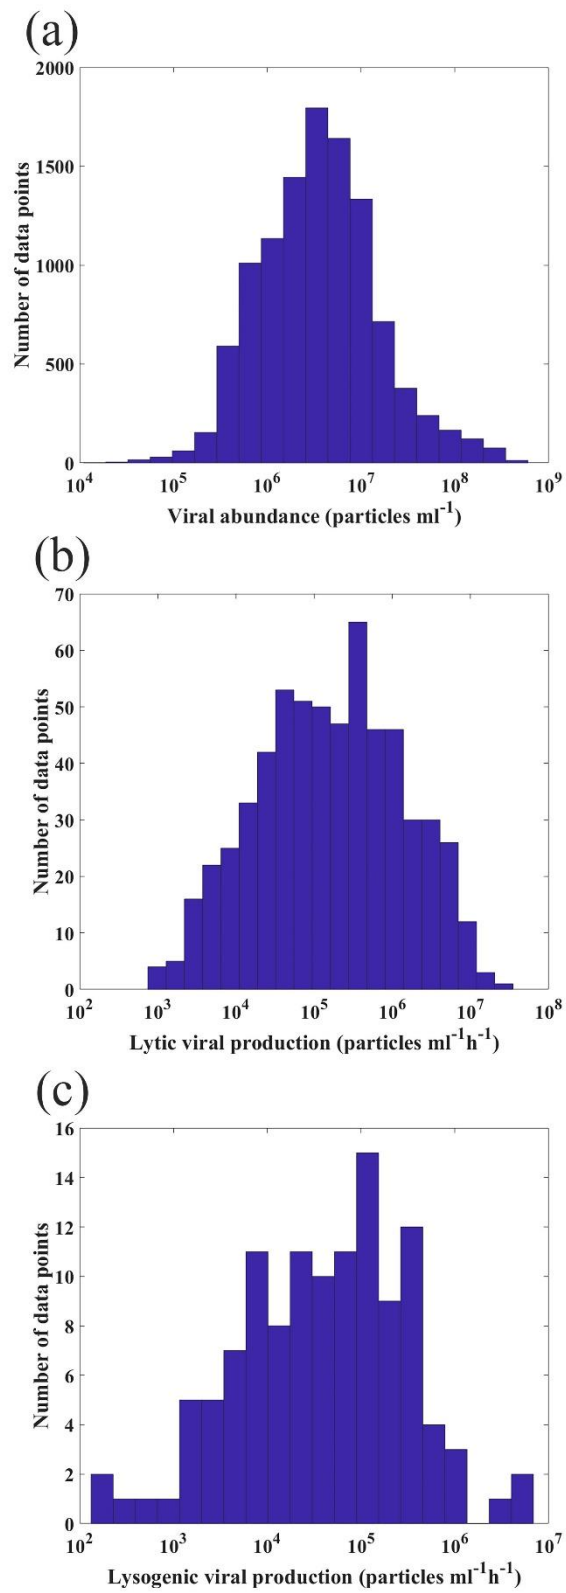

Figure S2. Histogram of data points on logarithmic scale, (a) viral abundance, (b) lytic viral production, and (c) lysogenic viral production.

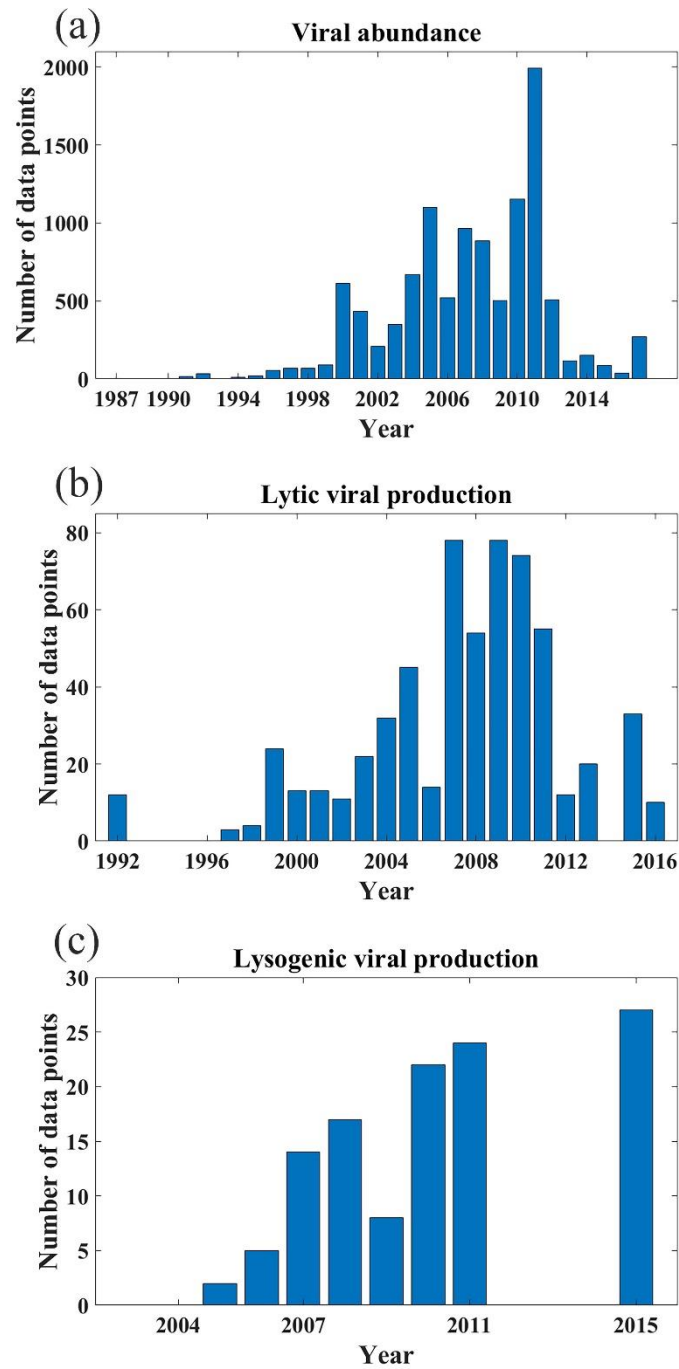

Figure S3. Number of samples in each year for (a) viral abundance, (b) lytic viral production and (c) lysogenic viral production.

## References

Auguet, J. C., Montanie, H., Delmas, D., Hartmann, H. J., and Huet, V.: Dynamic of virioplankton abundance and its environmental control in the Charente estuary (France), *Microb Ecol*, 50, 337-349, <https://doi.org/10.1007/s00248-005-0183-2>, 2005.

Balsom, A. L.: Macroinfaunal community composition and biomass, and bacterial and viral abundances from the gulf of Alaska to the Canadian Archipelago : a biodiversity study, MSc thesis, 2003.

Bettarel, Y., Arfi, R., Bouvier, T., Bouvy, M., Briand, E., Colombet, J., Corbin, D., and Sime-Ngando, T.: Virioplankton distribution and activity in a tropical eutrophicated bay, *Estuar Coast Shelf S*, 80, 425-429, <https://doi.org/10.1016/j.ecss.2008.08.018>, 2008.

Bettarel, Y., Bouvier, T., Agis, M., Bouvier, C., Chu, T. V., Combe, M., Mari, X., Nghiem, M. N., Nguyen, T. T., Pham, T. T., Pringault, O., Rochelle-Newall, E., Torretton, J. P., and Tran, H. Q.: Viral distribution and life strategies in the Bach Dang Estuary, Vietnam, *Microb Ecol*, 62, 143-154, <https://doi.org/10.1007/s00248-011-9835-6>, 2011a.

Bettarel, Y., Bouvier, T., Bouvier, C., Carre, C., Desnues, A., Domaizon, I., Jacquet, S., Robin, A., and Sime-Ngando, T.: Ecological traits of planktonic viruses and prokaryotes along a full-salinity gradient, *FEMS Microbiol Ecol*, 76, 360-372, <https://doi.org/10.1111/j.1574-6941.2011.01054.x>, 2011b.

Bettarel, Y., Dolan, J. R., Hornak, K., Lemée, R., Masin, M., Pedrotti, M.-L., Rochelle-Newall, E., Simek, K., and Sime-Ngando, T.: Strong, weak, and missing links in a microbial community of the N.W. Mediterranean Sea, *FEMS Microbiol Ecol*, 42, 451-462, <https://doi.org/10.1111/j.1574-6941.2002.tb01034.x>, 2002.

Bongiorni, L., Magagnini, M., Armeni, M., Noble, R., and Danovaro, R.: Viral production, decay rates, and life strategies along a trophic gradient in the north Adriatic Sea, *Appl Environ Microbiol*, 71, 6644-6650, <https://doi.org/10.1128/AEM.71.11.6644-6650.2005>, 2005.

Boras, J. A., Sala, M. M., Arrieta, J. M., Sà, E. L., Felipe, J., Agustí, S., Duarte, C. M., and Vaqué, D.:

Effect of ice melting on bacterial carbon fluxes channelled by viruses and protists in the Arctic Ocean, *Polar Biology*, 33, 1695-1707, <https://doi.org/10.1007/s00300-010-0798-8>, 2010a.

Boras, J. A., Sala, M. M., Baltar, F., Ari'stegui, J., Duarte, C. M., and Vaque, D.: Effect of viruses and protists on bacteria in eddies of the Canary Current region (subtropical northeast Atlantic), *Limnol Oceanogr*, 55, 885-898, <https://doi.org/10.4319/lo.2009.55.2.0885>, 2010b.

Boras, J. A., Sala, M. M., Vazquez-Dominguez, E., Weinbauer, M. G., and Vaque, D.: Annual changes of bacterial mortality due to viruses and protists in an oligotrophic coastal environment (NW Mediterranean), *Environ Microbiol*, 11, 1181-1193, <https://doi.org/10.1111/j.1462-2920.2008.01849.x>, 2009.

Bouvier, T. and Maurice, C. F.: A single-cell analysis of viroplankton adsorption, infection, and intracellular abundance in different bacterioplankton physiologic categories, *Microb Ecol*, 62, 669-678, <https://doi.org/10.1007/s00248-011-9862-3>, 2011.

Bouvy, M., Combe, M., Bettarel, Y., Dupuy, C., Rochelle-Newall, E., and Charpy, L.: Uncoupled viral and bacterial distributions in coral reef waters of Tuamotu Archipelago (French Polynesia), *Mar Pollut Bull*, 65, 506-515, <https://doi.org/10.1016/j.marpolbul.2012.01.001>, 2012.

Brum, J. R.: Concentration, production and turnover of viruses and dissolved DNA pools at Stn ALOHA, North Pacific Subtropical Gyre, *Aquat Microb Ecol*, 41, 103-113, <https://doi.org/10.3354/ame041103>, 2005.

Brum, J. R., Hurwitz, B. L., Schofield, O., Ducklow, H. W., and Sullivan, M. B.: Seasonal time bombs: dominant temperate viruses affect Southern Ocean microbial dynamics, *ISME J*, 10, 437-449, <https://doi.org/10.1038/ismej.2015.125>, 2016.

Cabral, A. S., Lessa, M. M., Junger, P. C., Thompson, F. L., and Paranhos, R.: Viroplankton dynamics are related to eutrophication levels in a tropical urbanized bay, *Plos One*, 12, e0174653, <https://doi.org/10.1371/journal.pone.0174653>, 2017.

Chen, X., Liu, H., Weinbauer, M., Chen, B., and Jiao, N.: Viral dynamics in the surface water of the

western South China Sea in summer 2007, *Aquat Microb Ecol*, 63, 145-160, <https://doi.org/10.3354/ame01490>, 2011.

Chen, X., Wei, W., Wang, J., Li, H., Sun, J., Ma, R., Jiao, N., and Zhang, R.: Tide driven microbial dynamics through virus-host interactions in the estuarine ecosystem, *Water Res*, 160, 118 – 129, <https://doi.org/10.1016/j.watres.2019.05.051>, 2019.

Choi, D. H., Hwang, C. Y., and Cho, B. C.: Comparison of virus- and bacterivory-induced bacterial mortality in the eutrophic Masan Bay, Korea, *Aquat Microb Ecol*, 30, 117-125, <https://doi.org/10.3354/ame030117>, 2003.

Clasen, J. L., Brigden, S. M., Payet, J. P., and Suttle, C. A.: Evidence that viral abundance across oceans and lakes is driven by different biological factors, *Freshwater Biol*, 53, 1090-1100, <https://doi.org/10.1111/j.1365-2427.2008.01992.x>, 2008.

Cochran, P. K. and Paul, J. H.: Seasonal Abundance of Lysogenic Bacteria in a Subtropical Estuary, *Appl Environ Microbiol*, 64, 2308-2312, <https://doi.org/10.1089/oli.1.1998.8.249>, 1998.

De Corte, D., Sintes, E., Winter, C., Yokokawa, T., Reinthaler, T., and Herndl, G. J.: Links between viral and prokaryotic communities throughout the water column in the (sub)tropical Atlantic Ocean, *ISME J*, 4, 1431-1442, <https://doi.org/10.1038/ismej.2010.65>, 2010.

De Corte, D., Sintes, E., Yokokawa, T., Lekunberri, I., and Herndl, G. J.: Large-scale distribution of microbial and viral populations in the South Atlantic Ocean, *Environ Microbiol Rep*, 8, 305-315, <https://doi.org/10.1111/1758-2229.12381>, 2016.

De Corte, D., Sintes, E., Yokokawa, T., Reinthaler, T., and Herndl, G. J.: Links between viruses and prokaryotes throughout the water column along a North Atlantic latitudinal transect, *ISME J*, 6, 1566-1577, <https://doi.org/10.1038/ismej.2011.214>, 2012.

Evans, C. and Brussaard, C. P.: Regional variation in lytic and lysogenic viral infection in the Southern Ocean and its contribution to biogeochemical cycling, *Appl Environ Microbiol*, 78, 6741-6748, <https://doi.org/10.1128/AEM.01388-12>, 2012.

Evans, C., Pearce, I., and Brussaard, C. P.: Viral-mediated lysis of microbes and carbon release in the sub-Antarctic and Polar Frontal zones of the Australian Southern Ocean, *Environ Microbiol*, 11, 2924-2934, <https://doi.org/10.1111/j.1462-2920.2009.02050.x>, 2009.

Finke, J. F., Hunt, B. P. V., Winter, C., Carmack, E. C., and Suttle, C. A.: Nutrients and other environmental factors influence virus abundances across oxic and hypoxic marine environments, *Viruses*, 9, <https://doi.org/10.3390/v9060152>, 2017.

Fonda Umani, S., Malisana, E., Focaracci, F., Magagnini, M., Corinaldesi, C., and Danovaro, R.: Disentangling the effect of viruses and nanoflagellates on prokaryotes in bathypelagic waters of the Mediterranean Sea, *Mar Ecol Prog Ser*, 418, 73-85, <https://doi.org/10.3354/meps08803>, 2010.

Fuhrman, J. A., Hewson, I., Schwalbach, M. S., Steele, J. A., Brown, M. V., and Naeem, S.: Annually reoccurring bacterial communities are predictable from ocean conditions, *Proc Natl Acad Sci U S A*, 103, 13104-13109, <https://doi.org/10.1073/pnas.0602399103>, 2006.

Gainer, P. J., Pound, H. L., Larkin, A. A., LeClerc, G. R., DeBruyn, J. M., Zinser, E. R., Johnson, Z. I., and Wilhelm, S. W.: Contrasting seasonal drivers of virus abundance and production in the North Pacific Ocean, *PLoS One*, 12, e0184371, <https://doi.org/10.1371/journal.pone.0184371>, 2017.

Gregoracci, G. B., Soares, A. C., Miranda, M. D., Coutinho, R., and Thompson, F. L.: Insights into the microbial and viral dynamics of a coastal downwelling-upwelling transition, *PLoS One*, 10, e0137090, <https://doi.org/10.1371/journal.pone.0137090>, 2015.

Hewson, I. and Fuhrman, J. A.: Covariation of viral parameters with bacterial assemblage richness and diversity in the water column and sediments, *Deep Sea Research Part I: Oceanographic Research Papers*, 54, 811-830, <https://doi.org/10.1016/j.dsr.2007.02.003>, 2007.

Holmfeldt, K., Titelman, J., and Riemann, L.: Virus production and lysate recycling in different sub-basins of the northern Baltic Sea, *Microb Ecol*, 60, 572-580, <https://doi.org/10.1007/s00248-010-9668-8>, 2010.

Hwang, C. Y. and Cho, B. C.: Virus-infected bacteria in oligotrophic open waters of the East Sea, Korea,

Aquat Microb Ecol, 30, 1-9, <https://doi.org/10.3354/ame030001>, 2002.

Jasna, V., Parvathi, A., Pradeep Ram, A. S., Balachandran, K. K., Madhu, N. V., Nair, M., Jyothibabu, R., Jayalakshmy, K. V., Revichandran, C., and Sime-Ngando, T.: Viral-induced mortality of prokaryotes in a tropical monsoonal estuary, Front Microbiol, 8, 895, <https://doi.org/10.3389/fmicb.2017.00895>, 2017.

Jasna, V., Pradeep Ram, A. S., Parvathi, A., and Sime-Ngando, T.: Differential impact of lytic viruses on prokaryotic morphopopulations in a tropical estuarine system (Cochin estuary, India), Plos One, 13, e0194020, <https://doi.org/10.1371/journal.pone.0194020>, 2018.

Jiang, S. C. and Paul, J. H.: Occurrence of lysogenic bacteria in marine microbial communities as determined by prophage induction, Mar Ecol Prog Ser, 142, 27-38, <https://doi.org/10.3354/meps142027>, 1996.

Kopylov, A. I., Sazhin, A. F., Zabolotkina, E. A., Romanenko, A. V., Romanova, N. D., and Boltchenkova, M. A.: Virioplankton of the Kara Sea and the Yenisei River estuary in early spring, Estuar Coast Shelf S, 217, 37-44, <https://doi.org/10.1016/j.ecss.2018.10.015>, 2019.

Kostner, N., Scharnreitner, L., Jurgens, K., Labrenz, M., Herndl, G. J., and Winter, C.: High viral abundance as a consequence of low viral decay in the Baltic Sea redoxcline, PLoS One, 12, e0178467, <https://doi.org/10.1371/journal.pone.0178467>, 2017.

Lara, E., Vaqué, D., Sà, E. L., Boras, J. A., Gomes, A., Borrull, E., Díez-Vives, C., Teira, E., Pernice, M. C., Garcia, F. C., Forn, I., Castillo, Y. M., Peiró, A., Salazar, G., Morán, X. A. G., Massana, R., Catalá, T. S., Luna, G. M., Agustí, S., Estrada, M., Gasol, J. M., and Duarte, C. M.: Unveiling the role and life strategies of viruses from the surface to the dark ocean, Sci Adv, 3, e1602565, <https://doi.org/10.1126/sciadv.1602565>, 2017.

Li, W. K. W. and Dickie, P. M.: Monitoring phytoplankton, bacterioplankton, and virioplankton in a coastal inlet (Bedford Basin) by flow cytometry, Cytometry: The Journal of the International Society for Analytical Cytology, 44, 236-246, [https://doi.org/10.1002/1097-0320\(20010701\)44:3<236::aid-cyto1116>3.0.co;2-5](https://doi.org/10.1002/1097-0320(20010701)44:3<236::aid-cyto1116>3.0.co;2-5), 2001.

Li, Y., Luo, T., Sun, J., Cai, L., Liang, Y., Jiao, N., and Zhang, R.: Lytic viral infection of bacterioplankton in deep waters of the western Pacific Ocean, *Biogeosciences*, 11, 2531-2542, <https://doi.org/10.5194/bg-11-2531-2014>, 2014.

Li, Z. S., Wang, M., Luo, Z. X., Liu, L., Xia, J., Gong, Z., Jiang, Y., Shao, H. B., Chen, H. T., and Tian, J. W.: Vertical distribution and dynamic variation of virioplankton in the mariana trench. , *Oceanologia et Limnologia Sinica*, 49, 1251-1258, <https://doi.org/10.11693/hyhz20180400105>, 2018.

Liang, Y., Li, L., Luo, T., Zhang, Y., Zhang, R., and Jiao, N.: Horizontal and vertical distribution of marine virioplankton: a basin scale investigation based on a global cruise, *PLoS One*, 9, e111634, <https://doi.org/10.1371/journal.pone.0111634>, 2014.

Liang, Y., Zhang, Y., Zhang, Y., Luo, T., Rivkin, R. B., and Jiao, N.: Distributions and relationships of virio- and picoplankton in the epi-, meso- and bathypelagic zones of the Western Pacific Ocean, *FEMS Microbiol Ecol*, 93, <https://doi.org/10.1093/femsec/fiw238>, 2017.

Long, A., McDaniel, L. D., Mobberley, J., and Paul, J. H.: Comparison of lysogeny (prophage induction) in heterotrophic bacterial and *Synechococcus* populations in the Gulf of Mexico and Mississippi River plume, *ISME J*, 2, 132-144, <https://doi.org/10.1038/ismej.2007.102>, 2008.

Ma, Y., Wang, M., Xia, J., Song, X., Liu, Q., Li, Y., Jiang, Y., Shao, H. B., and Zhang, Y. Y.: Studies on abundance and diversity of microplankton during brown tide around Qin-huangdao area, *Periodical of Ocean University of China*, 46, 142-150, <https://doi.org/10.16441/j.cnki.hdxh.20150426>, 2016.

Magagnini, M., Corinaldesi, C., Monticelli, L. S., De Domenico, E., and Danovaro, R.: Viral abundance and distribution in mesopelagic and bathypelagic waters of the Mediterranean Sea, *Deep Sea Research Part I: Oceanographic Research Papers*, 54, 1209-1220, <https://doi.org/10.1016/j.dsr.2007.05.006>, 2007.

Magiopoulos, I. and Pitta, P.: Viruses in a deep oligotrophic sea: Seasonal distribution of marine viruses in the epi-, meso- and bathypelagic waters of the Eastern Mediterranean Sea, *Deep Sea Research Part I: Oceanographic Research Papers*, 66, 1-10, <https://doi.org/10.1016/j.dsr.2012.03.009>, 2012.

Malits, A., Christaki, U., Obernosterer, I., and Weinbauer, M. G.: Enhanced viral production and virus-



mediated mortality of bacterioplankton in a natural iron-fertilized bloom event above the Kerguelen Plateau, *Biogeosciences*, 11, 6841-6853, <https://doi.org/10.5194/bg-11-6841-2014>, 2014.

Matteson, A. R., Loar, S. N., Pickmere, S., DeBruyn, J. M., Ellwood, M. J., Boyd, P. W., Hutchins, D. A., and Wilhelm, S. W.: Production of viruses during a spring phytoplankton bloom in the South Pacific Ocean near of New Zealand, *FEMS Microbiol Ecol*, 79, 709-719, <https://doi.org/10.1111/j.1574-6941.2011.01251.x>, 2012.

Maurice, C. F., Bouvier, C., de Wit, R., and Bouvier, T.: Linking the lytic and lysogenic bacteriophage cycles to environmental conditions, host physiology and their variability in coastal lagoons, *Environ Microbiol*, 15, 2463-2475, <https://doi.org/10.1111/1462-2920.12120>, 2013.

Maurice, C. F., Mouillot, D., Bettarel, Y., De Wit, R., Sarmiento, H., and Bouvier, T.: Disentangling the relative influence of bacterioplankton phylogeny and metabolism on lysogeny in reservoirs and lagoons, *ISME J*, 5, 831-842, <https://doi.org/10.1038/ismej.2010.181>, 2011.

Mojica, K. D. A., van de Poll, W. H., Kehoe, M., Huisman, J., Timmermans, K. R., Buma, A. G. J., van der Woerd, H. J., Hahn-Woernle, L., Dijkstra, H. A., and Brussaard, C. P. D.: Phytoplankton community structure in relation to vertical stratification along a north-south gradient in the northeast Atlantic Ocean, *Limnol Oceanogr*, 60, 1498-1521, <https://doi.org/10.1002/lno.10113>, 2015.

Motegi C and Nagata T: Enhancement of viral production by addition of nitrogen or nitrogen plus carbon in subtropical surface waters of the South Pacific, *Aquat Microb Ecol*, 48, 27-34, <https://doi.org/10.3354/ame048027>, 2007.

Motegi, C., Kaiser, K., Benner, R., and Weinbauer, M. G.: Effect of P-limitation on prokaryotic and viral production in surface waters of the northwestern Mediterranean Sea, *J Plankton Res*, 37, 16-20, <https://doi.org/10.1093/plankt/fbu089>, 2014.

Motegi, C., Nagata, T., Miki, T., Weinbauer, M. G., Legendre, L., and Rassoulzadegand, F.: Viral control of bacterial growth efficiency in marine pelagic environments, *Limnol Oceanogr*, 54, 1901-1910, <https://doi.org/10.4319/lo.2009.54.6.1901>, 2009.

Muck, S., Griessler, T., Kostner, N., Klimiuk, A., Winter, C., and Herndl, G. J.: Fracture zones in the Mid Atlantic Ridge lead to alterations in prokaryotic and viral parameters in deep-water masses, *Front Microbiol*, 5, 264, <https://doi.org/10.3389/fmicb.2014.00264>, 2014.

Nguyen-Kim, H., Bettarel, Y., Bouvier, T., Bouvier, C., Doan-Nhu, H., Nguyen-Ngoc, L., Nguyen-Thanh, T., Tran-Quang, H., Brune, J., and Wommack, K. E.: Coral mucus is a hot spot for viral infections, *Appl Environ Microbiol*, 81, 5773-5783, <https://doi.org/10.1128/aem.00542-15>, 2015.

Ni, Z., Huang, X., and Zhang, X.: Picoplankton and virioplankton abundance and community structure in Pearl River estuary and Daya Bay, South China, *J Environ Sci (China)*, 32, 146-154, <https://doi.org/10.1016/j.jes.2014.12.019>, 2015.

Noble, R. T. and Fuhrman, J. A.: Rapid virus production and removal as measured with fluorescently labeled viruses as tracers., *Appl Environ Microbiol*, 66, 3790 – 3797, <https://doi.org/10.1128/Aem.66.9.3790-3797.2000>, 2000.

Ordulj, M., Krstulović, N., Šantić, D., Jozić, S., and Šolić, M.: Viral dynamics in two trophically different areas in the central Adriatic Sea, *Helgoland Mar Res*, 71, <https://doi.org/10.1186/s10152-017-0502-2>, 2017.

Parada, V., Baudoux, A. C., Sintes, E., Weinbauer, M. G., and Herndl, G. J.: Dynamics and diversity of newly produced virioplankton in the North Sea, *ISME J*, 2, 924-936, <https://doi.org/10.1038/ismej.2008.57>, 2008.

Parada, V., Sintes, E., van Aken, H. M., Weinbauer, M. G., and Herndl, G. J.: Viral abundance, decay, and diversity in the meso- and bathypelagic waters of the North Atlantic, *Appl Environ Microbiol*, 73, 4429-4438, <https://doi.org/10.1128/AEM.00029-07>, 2007.

Parsons, R. J., Breitbart, M., Lomas, M. W., and Carlson, C. A.: Ocean time-series reveals recurring seasonal patterns of virioplankton dynamics in the northwestern Sargasso Sea, *ISME J*, 6, 273-284, <https://doi.org/10.1038/ismej.2011.101>, 2012.

Parsons, R. J., Nelson, C. E., Carlson, C. A., Denman, C. C., Andersson, A. J., Kledzik, A. L., Vergin, K.

L., McNally, S. P., Treusch, A. H., and Giovannoni, S. J.: Marine bacterioplankton community turnover within seasonally hypoxic waters of a subtropical sound: Devil's Hole, Bermuda, *Environ Microbiol*, 17, 3481-3499, <https://doi.org/10.1111/1462-2920.12445>, 2015.

Parvathi, A., Jasna, V., Aparna, S., Pradeep Ram, A. S., Aswathy, V. K., Balachandran, K. K., Muraleedharan, K. R., Mathew, D., and Sime-Ngando, T.: High incidence of lysogeny in the oxygen minimum zones of the Arabian Sea (southwest coast of India), *Viruses*, 10, <https://doi.org/10.3390/v10110588>, 2018.

Parvathi, A., Jasna, V., Haridevi, K. C., Jina, S., Greeshma, M., Breezy, J., and Nair, M.: Diurnal variations in bacterial and viral production in Cochin estuary, India, *Environ Monit Assess*, 185, 8077-8088, <https://doi.org/10.1007/s10661-013-3156-9>, 2013.

Pasulka, A. L., Samo, T. J., and Landry, M. R.: Grazer and viral impacts on microbial growth and mortality in the southern California Current Ecosystem, *J Plankton Res*, 37, 320-336, <https://doi.org/10.1093/plankt/fbv011>, 2015.

Payet, J. P. and Suttle, C. A.: To kill or not to kill: The balance between lytic and lysogenic viral infection is driven by trophic status, *Limnol Oceanogr*, 58, 465–474, <https://doi.org/10.4319/lo.2013.58.2.0465>, 2013.

Proctor, L. M. and Fuhrman, J. A.: Viral Mortality of Marine-Bacteria and Cyanobacteria, *Nature*, 343, 60-62, <https://doi.org/10.1038/343060a0>, 1990.

Rowe, J. M., DeBruyn, J. M., Poorvin, L., LeCleir, G. R., Johnson, Z. I., Zinser, E. R., and Wilhelm, S. W.: Viral and bacterial abundance and production in the western Pacific Ocean and the relation to other oceanic realms, *FEMS Microbiol Ecol*, 79, 359-370, <https://doi.org/10.1111/j.1574-6941.2011.01223.x>, 2012.

Rowe, J. M., Saxton, M. A., Cottrell, M. T., DeBruyn, J. M., Berg, G. M., Kirchman, D. L., Hutchins, D. A., and Wilhelm, S. W.: Constraints on viral production in the Sargasso Sea and North Atlantic, *Aquat Microb Ecol*, 52, 233-244, <https://doi.org/10.3354/ame01231>, 2008.

Sabbagh, E. I., Huete-Stauffer, T. M., Calleja, M. L. L., Silva, L., Viegas, M., and Moran, X. A. G.: Weekly variations of viruses and heterotrophic nanoflagellates and their potential impact on bacterioplankton in shallow waters of the central Red Sea, *FEMS Microbiol Ecol*, 96, <https://doi.org/10.1093/femsec/fiaa033>, 2020.

Steward, G. F., Smith, D. C., and Azam, F.: Abundance and production of bacteria and viruses in the Bering and Chukchi Seas, *Mar Ecol Prog Ser* 131, 297-300, <https://doi.org/10.3354/meps131287>, 1996.

Strzepek, R. F., Maldonado, M. T., Higgins, J. L., Hall, J., Safi, K., Wilhelm, S. W., and Boyd, P. W.: Spinning the “Ferrous Wheel”: The importance of the microbial community in an iron budget during the FeCycle experiment, *Global Biogeochem Cy*, 19, <https://doi.org/10.1029/2005gb002490>, 2005.

Šulčius, S., Reunamo, A., Paškauskas, R., and Leskinen, P.: Influence of environmental variation on the bacterioplankton community and its loss to viral lysis in the Curonian Lagoon, *Estuar Coast Shelf S*, 204, 76-85, <https://doi.org/10.1016/j.ecss.2018.02.029>, 2018.

Taylor, G. T., Hein, C., and Iabichella, M.: Temporal variations in viral distributions in the anoxic Cariaco Basin, *Aquat Microb Ecol*, 30, 103-116, <https://doi.org/10.3354/ame030103>, 2003.

Thompson, F., Winter, C., Garcia, J. A. L., Weinbauer, M. G., DuBow, M. S., and Herndl, G. J.: Comparison of deep-water viromes from the Atlantic Ocean and the Mediterranean Sea, *PLoS ONE*, 9, e100600, <https://doi.org/10.1371/journal.pone.0100600>, 2014.

Vaque, D., Boras, J. A., Torrent-Llagostera, F., Agusti, S., Arrieta, J. M., Lara, E., Castillo, Y. M., Duarte, C. M., and Sala, M. M.: Viruses and protists induced-mortality of prokaryotes around the Antarctic Peninsula during the austral summer, *Front Microbiol*, 8, 241, <https://doi.org/10.3389/fmicb.2017.00241>, 2017.

Wang, K., Wommack, K. E., and Chen, F.: Abundance and distribution of *Synechococcus* spp. and cyanophages in the Chesapeake Bay, *Appl Environ Microbiol*, 77, 7459-7468, <https://doi.org/10.1128/AEM.00267-11>, 2011.

Weinbauer, M. G., Brettar, I., and Hofle, M. G.: Lysogeny and virus-induced mortality of

bacterioplankton in surface, deep, and anoxic marine waters, *Limnol Oceanogr*, 48, 1457–1465, <https://doi.org/10.4319/lo.2003.48.4.1457>, 2003.

Weinbauer, M. G., Fuks, D., and Peduzzi, P.: Distribution of viruses and dissolved DNA along a coastal trophic gradient in the northern Adriatic Sea, *Appl Environ Microbiol*, 59, 4074-4082, [https://doi.org/10.1016/0166-0934\(93\)90107-3](https://doi.org/10.1016/0166-0934(93)90107-3), 1993.

Weinbauer, M. G., Jesus-Maria Arrieta, Christian Griebler, and Herndl, G. J.: Enhanced viral production and infection of bacterioplankton during an iron-induced phytoplankton bloom in the Southern Ocean, *Limnol Oceanogr*, 54, 774-784, <https://doi.org/10.4319/lo.2009.54.3.0774>, 2009.

Weinbauer, M. G. and Suttle, C. A.: Lysogeny and prophage induction in coastal and offshore bacterial communities, *Aquat Microb Ecol*, 18, 217-225, <https://doi.org/10.3354/ame018217>, 1999.

Weinbauer, M. G. and Suttle, C. A.: Potential significance of lysogeny to bacteriophage production and bacterial mortality in coastal waters of the Gulf of Mexico, *Appl Environ Microbiol*, 62, 4374-4380, 1996.

Weinbauer, M. G., Winter, C., and Höfle, M. G.: Reconsidering transmission electron microscopy based estimates of viral infection of bacterio-plankton using conversion factors derived from natural communities, *Aquat Microb Ecol*, 27, 103–110, <https://doi.org/10.3354/ame027103>, 2002.

Wells, L. E. and Deming, J. W.: Significance of bacterivory and viral lysis in bottom waters of Franklin Bay, Canadian Arctic, during winter, *Aquat Microb Ecol*, 43, 209–221, <https://doi.org/10.3354/ame043209>, 2006.

Wigington, C. H., Sonderegger, D., Brussaard, C. P. D., Buchan, A., Finke, J. F., Fuhrman, J. A., Lennon, J. T., Middelboe, M., Suttle, C. A., Stock, C., Wilson, W. H., Wommack, K. E., Wilhelm, S. W., and Weitz, J. S.: Re-examination of the relationship between marine virus and microbial cell abundances, *Nat Microbiol*, 1, 15024, <https://doi.org/10.1038/nmicrobiol.2015.24>, 2016.

Wilhelm, S. W., Jeffrey, W. H., Dean, A. L., Meador, J., Pakulski, J. D., and Mitchell, D. L.: UV radiation induced DNA damage in marine viruses along a latitudinal gradient in the southeastern Pacific Ocean,

Aquat Microb Ecol, 31, 1-8, <https://doi.org/10.3354/ame031001>, 2003.

Williamson, S. J., Houchin, L. A., McDaniel, L., and Paul, J. H.: Seasonal variation in lysogeny as depicted by prophage Induction in Tampa Bay, Florida, Appl Environ Microbiol, 68, 4307-4314, <https://doi.org/10.1128/aem.68.9.4307-4314.2002>, 2002.

Winget, D. M. and Wommack, K. E.: Diel and daily fluctuations in virioplankton production in coastal ecosystems, Environ Microbiol, 11, 2904-2914, <https://doi.org/10.1111/j.1462-2920.2009.02038.x>, 2009.

Winter, C., Herndl, G. J., and Weinbauer, M. G.: Diel cycles in viral infection of bacterioplankton in the North Sea, Aquat Microb Ecol, 35, 207-216, <https://doi.org/10.3354/ame035207>, 2004.

Winter, C., Kähler, N., Kruspe, C. P., Urban, D., Muck, S., Reinthaler, T., and Herndl, G. J.: Mixing alters the lytic activity of viruses in the dark ocean, Ecology, 99, 700-713, <https://doi.org/10.1002/ecy.2135>, 2018.

Winter, C., Kerros, M.-E., and Weinbauer, M. G.: Seasonal and depth-related dynamics of prokaryotes and viruses in surface and deep waters of the northwestern Mediterranean Sea, Deep Sea Research Part I: Oceanographic Research Papers, 56, 1972-1982, <https://doi.org/10.1016/j.dsr.2009.07.003>, 2009.

Winter, C., Moeseneder, M. M., Herndl, G. J., and Weinbauer, M. G.: Relationship of geographic distance, depth, temperature, and viruses with prokaryotic communities in the eastern tropical Atlantic Ocean, Microb Ecol, 56, 383-389, <https://doi.org/10.1007/s00248-007-9343-x>, 2008.

Winter, C., Smit, A., Szoeké-Dénes, T., Herndl, G. J., and Weinbauer, M. G.: Modelling viral impact on bacterioplankton in the North Sea using artificial neural networks, Environ Microbiol, 7, 881-893, <https://doi.org/10.1111/j.1462-2920.2005.00768.x>, 2005.

Yang, Y., Yokokawa, T., Motegi, C., and Nagata, T.: Large-scale distribution of viruses in deep waters of the Pacific and Southern Oceans, Aquat Microb Ecol, 71, 193-202, <https://doi.org/10.3354/ame01677>, 2014.

Zhang, R., Weinbauer, M. G., and Qian, P. Y.: Viruses and flagellates sustain apparent richness and reduce biomass accumulation of bacterioplankton in coastal marine waters, Environ Microbiol, 9, 3008-3018,

<https://doi.org/10.1111/j.1462-2920.2007.01410.x>, 2007.

Zhao, Y., Zhao, Y., Zheng, S., Zhao, L., Li, X., Zhang, W., Gregori, G., and Xiao, T.: Virioplankton distribution in the tropical western Pacific Ocean in the vicinity of a seamount, *Microbiologyopen*, e1031, <https://doi.org/10.1002/mbo3.1031>, 2020.
