# Supplementary material for: A global viral oceanography database (gVOD)
Source: Copernicus journal article supplement (doi:10.5194/essd-13-1251-2021), 2021-03-24
Supplement: Supplementary file 2 [file essd-13-1251-2021-supplement.zip]

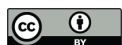

## *Supplement of*

## **A global viral oceanography database (gVOD)**

**Le Xie et al.**

*Correspondence to:* Rui Zhang ([ruizhang@xmu.edu.cn](mailto:ruizhang@xmu.edu.cn)) and Ya-Wei Luo ([ywluo@xmu.edu.cn](mailto:ywluo@xmu.edu.cn))

- [essd-13-1251-2021-supplement-title-page.pdf](#)
- supplement of gVOD
  - [Binning method.zip](#)
  - [random forest method.zip](#)
  - [supplement of gVOD.pdf](#)

The copyright of individual parts of the supplement might differ from the article licence.
